# Supplementary material for: A new stepwise synthesis of a family of propylamines derived from diatom silaffins and their activity in silicification
Source: Royal Society of Chemistry journal article supplement (doi:10.1039/b515967a), 2006-01-01

## Supplementary Information

### A New Stepwise Synthesis of a Family of Propylamines Derived from Diatom Silaffins and their Activity in Silicification

Vadim V. Annenkov,<sup>a,b\*</sup> Siddharth V. Patwardhan,<sup>b</sup> David Belton,<sup>b</sup> Elena N. Danilovtseva<sup>a</sup> and Carole C. Perry<sup>b\*</sup>

#### Synthetic Procedures

##### *N*-Methyl-*N,N*-bis[3-(methylamino)propyl]amine [tri(1-methylazetane)], N3

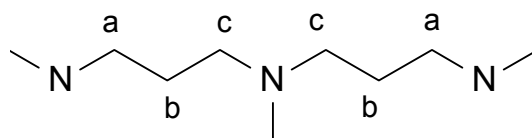

Methylamine (33%) in ethanol (94 g, 1 mole) was diluted with ethanol (40 mL) and methyl acrylate (172 g, 2 mole) diluted with ethanol (145 mL) was added to the methylamine solution in portions (~50 mL) at 20-40 °C. The mixture was left at room temperature for 5-7 days and the progress of the reaction monitored by FTIR spectroscopy. When the reaction was complete (disappearance of NH band (3300 cm<sup>-1</sup>, thin film method)), ethanol was distilled off under reduced pressure and the residue distilled under vacuum (90 °C, 0.2 mm Hg) to give di-β-carbethoxyethylmethylamine (191g, 94%) as a colourless liquid.

Di-β-carbethoxyethylmethylamine (180g, 0.89 mole) was added to methylamine in ethanol (33%), (250 g, 2.66 mole) and the mixture left at room temperature for 3-5 days. The progress of the reaction was monitored by FTIR as before. When the reaction was complete, (disappearance of the ester C=O band (1740 cm<sup>-1</sup>, thin film method)), ethanol was distilled off under reduced pressure and the residue dried under vacuum (70 °C, 0.2 mm Hg, 2 h) to give *N*-methyl-3-methyl[3-(methylamino)-3-oxopropyl]aminopropanamide (178g, 99%) as a viscous colourless liquid.

LiAlH<sub>4</sub> (16g, 0.42 mole) was suspended in anhydrous diethyl ether (550 mL) at room temperature. *N*-Methyl-3-methyl[3-(methylamino)-3-oxopropyl]aminopropanamide (20.1 g, 0.1 mole) was added to the suspension of LiAlH<sub>4</sub> portionwise during 6 h. The mixture was stirred for 12 h, cooled (-5 °C) and decomposed at 0-10 °C by the sequential addition of water (30 mL), a solution of KOH (22.5 g) in water (22.5 mL) followed by water alone (70 mL). The ether fraction was separated and the precipitate washed with diethyl ether (2 x 100 mL). Ether was distilled off and the residue distilled under vacuum (65 °C, 0.2 mm Hg) to give N3 (8.5 g, 49%) as a colourless liquid. FTIR (film, cm<sup>-1</sup>): 3292-3296, 2939-2945, 2788, 2839, 1450-1465, 1373, 1315, 1150, 1122, 1068, 733-740. <sup>1</sup>H NMR, (5% in CDCl<sub>3</sub>): 1.63ppm (5<sup>t</sup>, 4H, 2xCH<sub>2</sub> (b)), 2.15 (1<sup>t</sup>, 3H (NMe)), 2.35 (3<sup>t</sup>, 4H, 2xCH<sub>2</sub> (c)), 2.40 (1<sup>t</sup>, 6H, NHCH<sub>3</sub>), 2.58 (3<sup>t</sup>, 4H, (a)). ESI-MS +ve ion. 174.3 ([M+H]<sup>+</sup>).

##### *N*-Methyl-*N*-[3-(methylamino)propyl]-*N*-3-[methyl(3-methyl[3-(methylamino)propyl]aminopropyl) amino]propylamine [penta(1-methylazetane)], N5

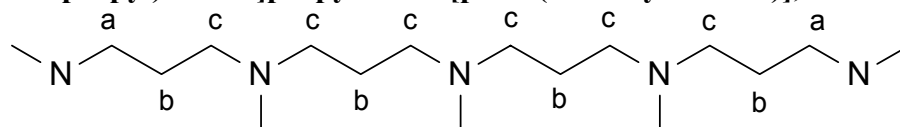

**N3** (12 g, 0.069 mole) was dissolved in ethanol (70 mL) and methyl acrylate (13.8 g, 0.16 mole). The mixture was boiled for 5-8 h, and the progress of the reaction monitored by FTIR spectroscopy. On completion of the reaction (disappearance of NH band ( $3300\text{ cm}^{-1}$ , thin film method)), ethanol was distilled off under reduced pressure and the residue dried under vacuum ( $70\text{ }^{\circ}\text{C}$ , 0.2 mm Hg, 2 h) to give methyl 6,10,14-trimethyl-3-oxo-2-oxa-6,10,14-triazaheptadecan-17-oate (24 g) as a colourless liquid in a near quantitative yield.

6,10,14-Trimethyl-3-oxo-2-oxa-6,10,14-triazaheptadecan-17-oate (24 g, 0.069 mole) in ethanol (12 mL) was added to methylamine in ethanol (33%) (50 g, 0.53 mole) and the mixture left at room temperature for 3-5 days. The progress of the reaction was monitored using FTIR spectroscopy. On completion of the reaction (disappearance of the ester C=O band ( $1740\text{ cm}^{-1}$ , thin film method)), ethanol was distilled off under reduced pressure and the residue dried under vacuum ( $70\text{ }^{\circ}\text{C}$ , 0.2 mm Hg, 2 h) to give *N*-6,10,14-tetramethyl-3-oxo-2,6,10,14-tetraazaheptadecan-17-amide (23.8 g) as a colourless liquid in near quantitative yield.

$\text{LiAlH}_4$  (7 g, 0.184 mole) was suspended in anhydrous diethyl ether (400 mL) at room temperature. *N*-6,10,14-Tetramethyl-3-oxo-2,6,10,14-tetraazaheptadecan-17-amide (23.8 g, 0.07 mole) portionwise over 6 h. The mixture was stirred for 12 h, cooled down to  $-5\text{ }^{\circ}\text{C}$  and decomposed at  $0\text{-}10\text{ }^{\circ}\text{C}$  by the sequential addition of water (13 mL), a solution of KOH (15 g) in water (15 mL) followed by water (30 mL). The ether fraction was separated and the precipitate washed with diethyl ether (2 x 75 mL). Ether was distilled off and the residue was distilled under vacuum ( $142\text{ }^{\circ}\text{C}$ , 0.2 mm Hg) to give **N5** (12 g (55%)) as a colourless liquid. FTIR (film,  $\text{cm}^{-1}$ ): 3292-3296, 2939-2945, 2788, 2839, 1450-1465, 1373, 1315, 1150, 1122, 1068, 733-740.  $^1\text{H}$  NMR, 5% in  $\text{CDCl}_3$ . 1.62ppm ( $\text{m}^t$ , 8H (b)), 2.14 (1 $^t$ , 9H (NMe)), 2.28-2.35 ( $\text{m}^t$ , 12H (c)), 2.40 (1 $^t$ , 6H (NHMe)), 2.58 ( $\text{m}^t$ , 4H (a)). ESI-MS +ve ion. 316.4 ( $[\text{M}+\text{H}]^+$ ), 245.4 ( $[\text{M}+\text{H}]^+ - \text{C}_3\text{H}_5\text{NHMe}$ ), 174.3 ( $[\text{M}+\text{H}]^+ - \text{C}_3\text{H}_5\text{N}(\text{Me})\text{C}_3\text{H}_6\text{NHMe}$ ).

***N*<sup>1</sup>,*N*<sup>23</sup>,4,8,12,16,20-heptamethyl-4,8,12,16,20-pentaazatricosane-1,23-diamine [hepta(1-methylazetane)], *N*7**

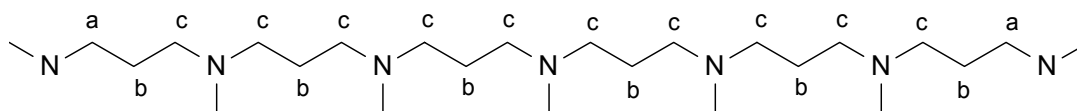

**N5** (8 g, 0.025 mole) was dissolved in ethanol (50 mL) and methyl acrylate (7 g, 0.08 mole). The mixture was boiled for 5-8 h and the progress of the reaction monitored using FTIR spectroscopy. On completion of the reaction (disappearance of the NH band ( $3300\text{ cm}^{-1}$ , thin film method)), ethanol was distilled off under reduced pressure and the residue dried under vacuum ( $70\text{ }^{\circ}\text{C}$ , 0.2 mm Hg, 2 h) to give dimethyl 4,8,12,16,20-pentamethyl-4,8,12,16,20-pentaazatricosane-1,23-dioate (12.1 g, ~100 %) as a colourless liquid.

4,8,12,16,20-Pentamethyl-4,8,12,16,20-pentaazatricosane-1,23-dioate (12.1 g, 0.025 mole) in ethanol (10 mL) was added to methylamine in ethanol (33%) (15g, 0.16 mole) and the mixture left at room temperature for 3-5 days. The progress of the reaction was monitored using FTIR spectroscopy. On completion of the reaction (disappearance of ester C=O band ( $1740\text{ cm}^{-1}$ , thin film method)), ethanol was distilled off under reduced pressure and the residue dried under vacuum ( $70\text{ }^{\circ}\text{C}$ , 0.2 mm Hg, 2 h) to give *N*<sup>1</sup>,*N*<sup>23</sup>,4,8,12,16,20-heptamethyl-4,8,12,16,20-pentaazatricosane-1,23-diamide (12 g) as a colourless liquid in near quantitative yield.

$\text{LiAlH}_4$  (2.5 g, 0.066 mole) was suspended in anhydrous diethyl ether (200 mL) at room temperature.  $N^1, N^{23}, 4, 8, 12, 16, 20$ -Heptamethyl-4,8,12,16,20-pentaazatricosane-1,23-diamide (12g, 0.025 mole) was added to the suspension of  $\text{LiAlH}_4$  in small portions (0.1-0.3 g) during 6 h. The mixture was stirred for 12 h, cooled down to  $-5^\circ\text{C}$  and decomposed at  $0-10^\circ\text{C}$  by the sequential addition of water (4.6 mL), a solution of KOH (5.5 g) in water (5.5 mL) followed by water alone (11 mL). The ether fraction was separated and the precipitate washed with diethyl ether (2 x 50 mL). Ether was distilled off and the residue distilled under vacuum ( $185^\circ\text{C}$ , 0.2 mm Hg) to give N7 (7.9 g, 69%) as a colourless liquid. FTIR (film,  $\text{cm}^{-1}$ ): 3292-3296, 2939-2945, 2788, 2839, 1450-1465, 1373, 1315, 1150, 1122, 1068, 733-740.  $^1\text{H}$  NMR, 5% in  $\text{CDCl}_3$ . 1.65ppm ( $\text{m}^t$ , 12H (b)), 2.20 ( $1^t$ , 15H (NMe)), 2.30-2.40 ( $\text{m}^t$ , 20H (c)), 2.42 ( $1^t$ , 6H (NHMe)), 2.62 ( $3^t$ , 4H (a)). ESI-MS +ve ion. 458.5 ( $[\text{M}+\text{H}]^+$ ), 387.5 ( $[\text{M}+\text{H}]^+ - \text{C}_3\text{H}_5\text{NHMe}$ ), 316.3 ( $[\text{M}+\text{H}]^+ - \text{C}_3\text{H}_5\text{NMeC}_3\text{H}_6\text{NHMe}$ ).

**SEM Silica prepared in the presence of N7 at a 1Si:1N ratio.**

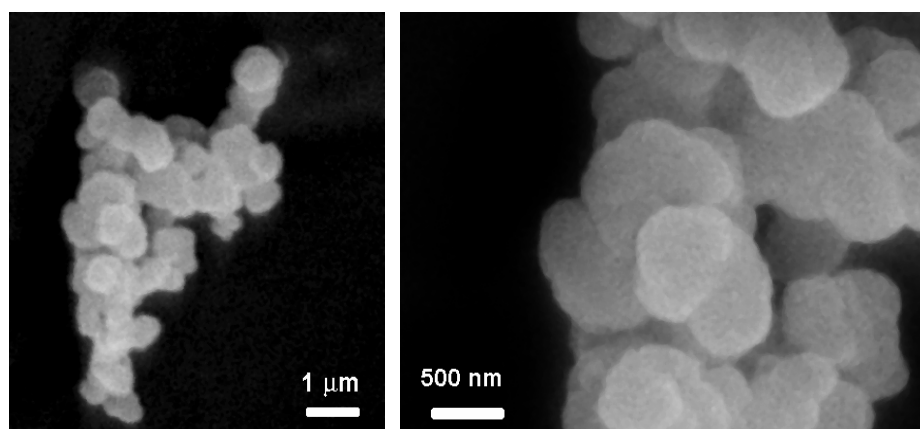

Supplement: b515967a.pdf [file b515967a.pdf]
